# Supplementary material
Source: publisher figshare collection journal article supplement (https://acs.figshare.com/ndownloader/files/14000558)
Supplement: Supplementary file 1 [file 14000558]

## **Supporting Information**

### **A Supramolecular Hydrogel Based on Chlorambucil and Peptide Drug for Cancer Combination Therapy**

Lijun Yang,<sup>#a</sup> Congrou Zhang,<sup>#a</sup> Chunhua Ren,<sup>a</sup> Jinjian Liu,<sup>a</sup> Yumin Zhang,<sup>a</sup> Jing Wang,<sup>a</sup> Fan Huang,<sup>\*a</sup> Lei Zhang<sup>\*b</sup> and Jianfeng Liu<sup>\*a</sup>

<sup>a</sup> Tianjin Key Laboratory of Radiation Medicine and Molecular Nuclear Medicine, Institute of Radiation Medicine, Chinese Academy of Medical Sciences & Peking Union Medical College, Tianjin 300192, P. R. China

<sup>b</sup> Dept. of Pharmacy, Affiliated Hospital of Logistics University of PAP, Tianjin 300162, P. R. China

\*Corresponding author: Dr. Fan Huang, E-mail address: [huangfanforever@126.com](mailto:huangfanforever@126.com);  
Prof. Lei Zhang, E-mail address: [13821329588@163.com](mailto:13821329588@163.com); Prof. Jianfeng Liu, E-mail address: [lewis78@163.com](mailto:lewis78@163.com)

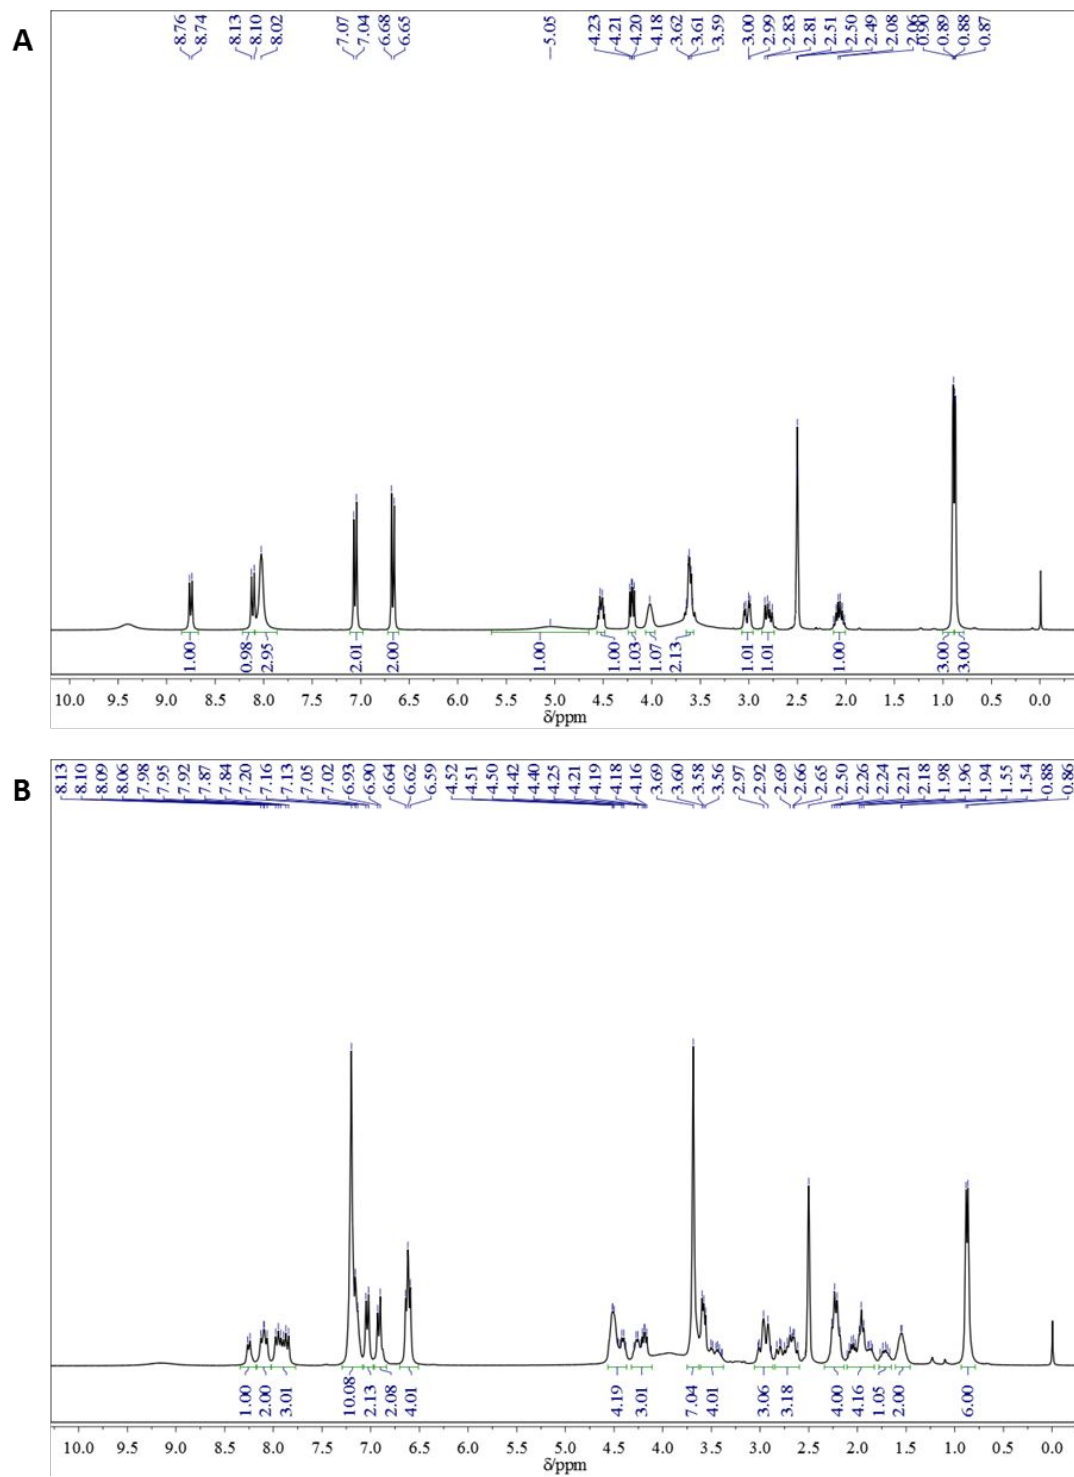

**Figure S1.  $^1\text{H}$  NMR spectra of (A) YSV and (B) CRB-FFE-YSV in  $\text{DMSO-d}_6$ .**

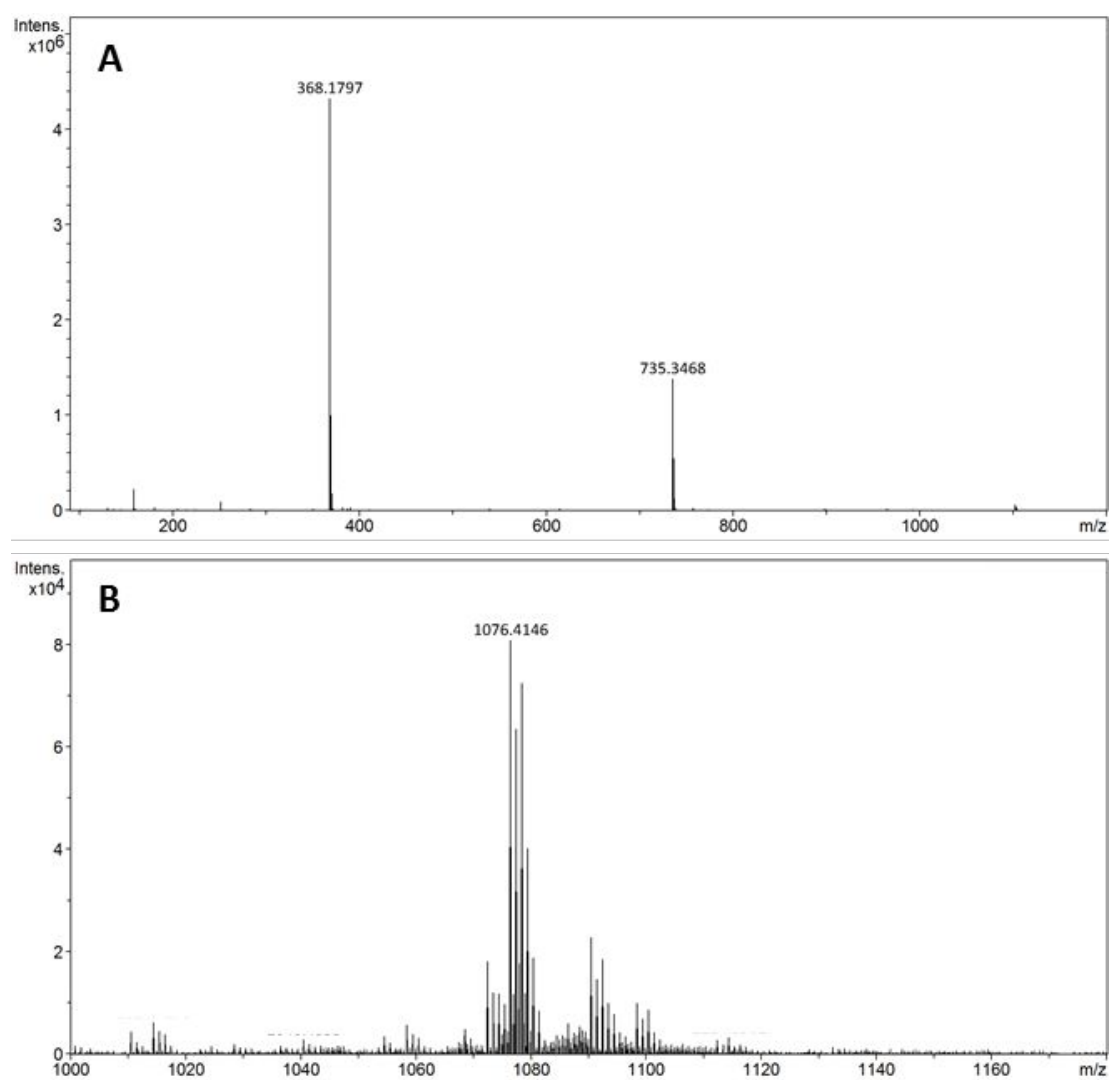

**Figure S2. HRMS spectra of (A) YSV and (B) CRB-FFE-YSV.**
